# Supplementary material for: Constructing a measurement-based spatially explicit inventory of US oil and gas methane emissions (2021)
Source: Copernicus journal article supplement (doi:10.5194/essd-16-3973-2024), 2024-09-10
Supplement: Supplementary file 1 [file essd-16-3973-2024-supplement.pdf]

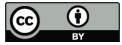

*Supplement of*

## **Constructing a measurement-based spatially explicit inventory of US oil and gas methane emissions (2021)**

**Mark Omara et al.**

*Correspondence to:* Mark Omara ([momara@edf.org](mailto:momara@edf.org)) and Ritesh Gautam ([rgautam@edf.org](mailto:rgautam@edf.org))

The copyright of individual parts of the supplement might differ from the article licence.

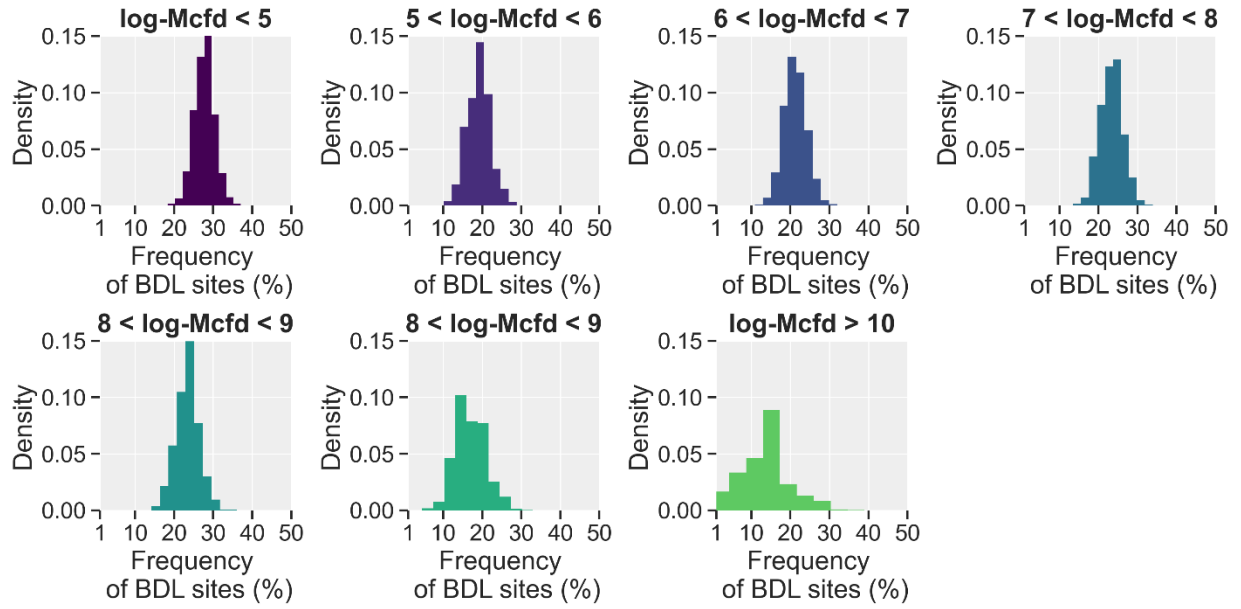

25 **Figure S1.** Frequency distribution for sites below the detection limit for different production cohorts of non-low production sites

30

35

40

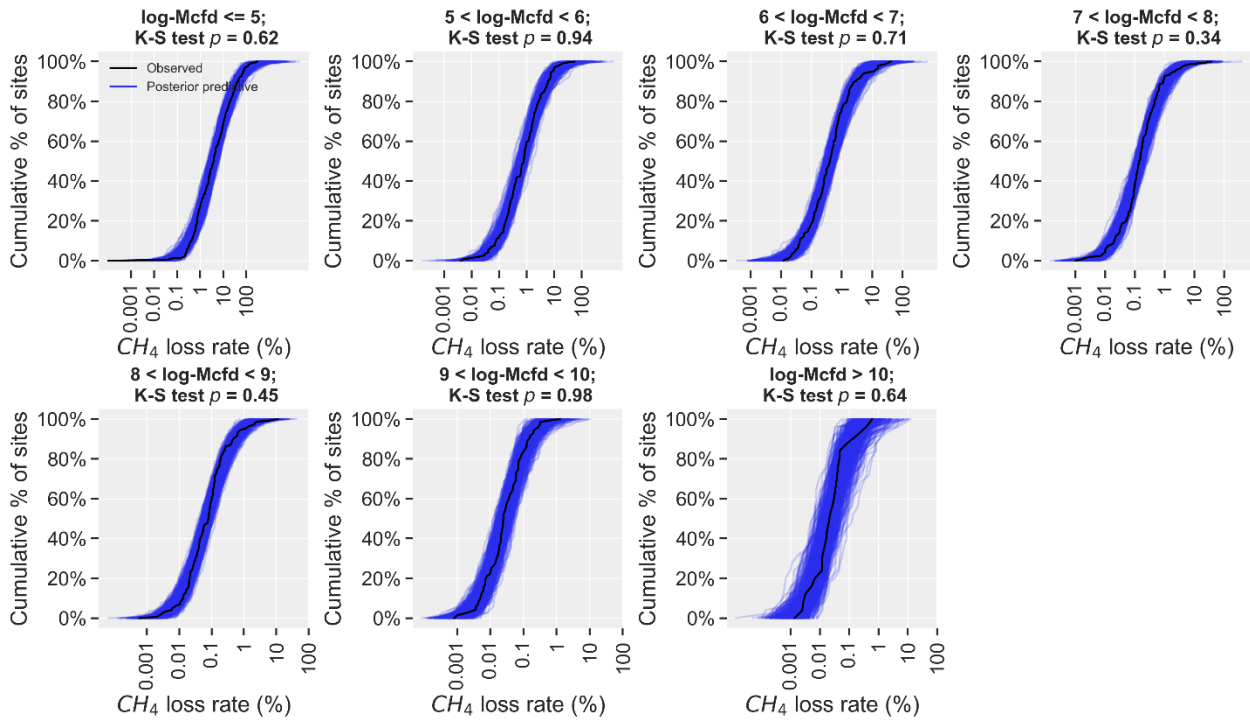

**Figure S2:** Random samples drawn from the modelled distribution for each production cohort, showing good agreement between modelled and empirical distributions.

45

50

55

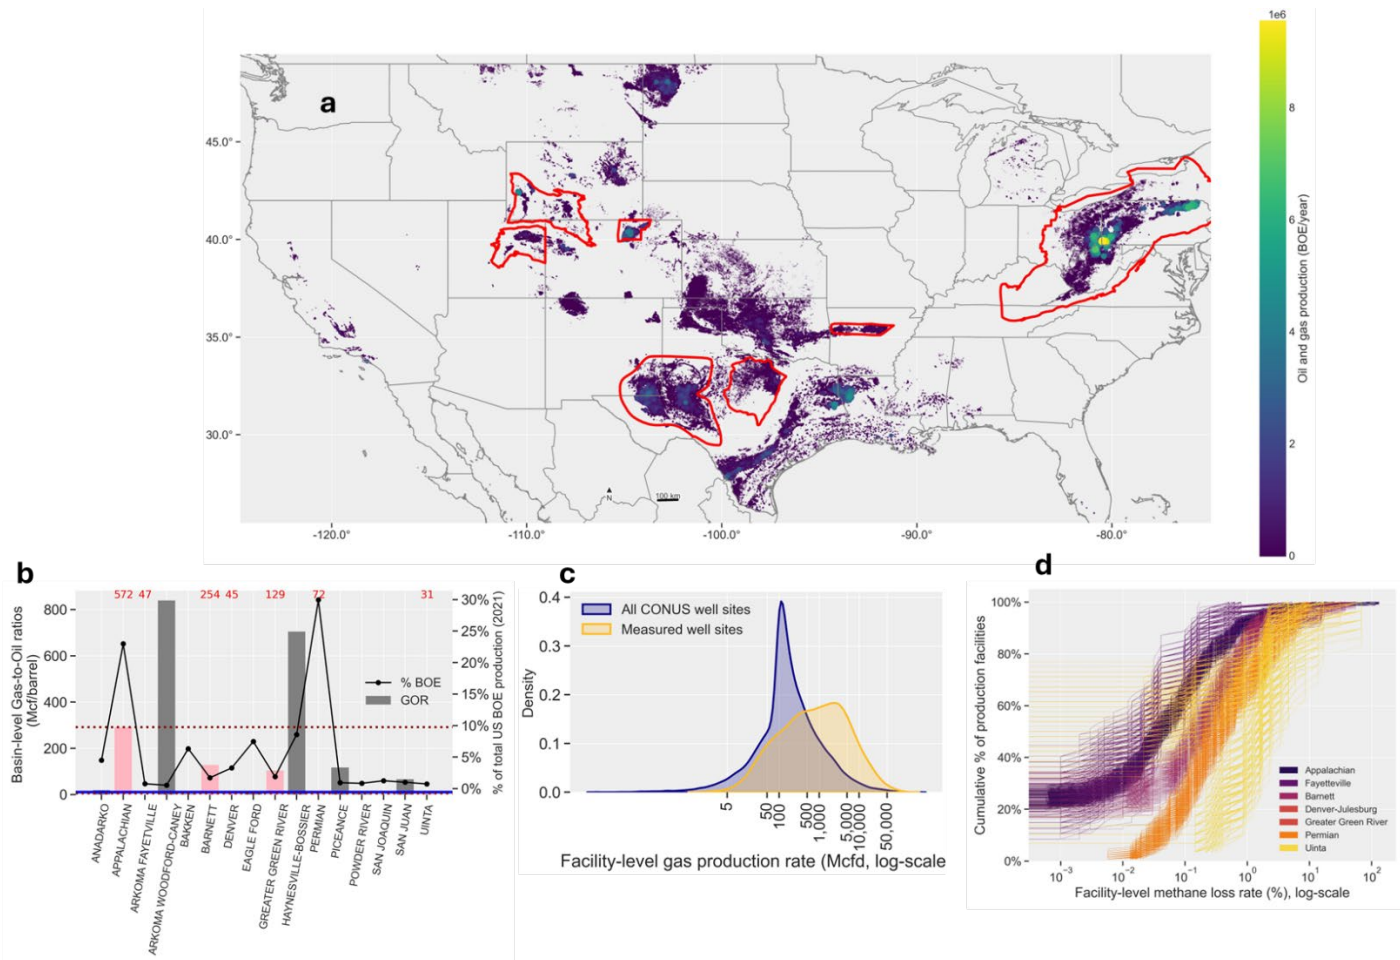

**Figure S3:** Geographical coverage, distribution of facility-level production rates, and emission rates for well site measurements used in this study. **a.** The heatmap shows the well site oil and gas production data for 2021, color-coded by combined oil and gas production rates (boe/year). Major basins for which substantial measurement-based data on oil and gas methane emissions are available are highlighted in red. **b.** Assessment of the basin-level production characteristics, based on average gas-to-oil ratios in Mcf/barrel in 2021. The bar plots show the basin-level GOR ratios, light pink bars correspond to basins for which measurement-based data (see Main Text on criteria) are available. The number of samples are shown in top x axis in red. The solid blue line shows the average GOR ratio for all sites in the US in 2021 (average of 11 Mcf/bbl) and the dotted dark red lines show the minimum (5 Mcf/barrel) and maximum (230 Mcf/barrel) for all the basins for which we have measurement-based data. The right y-axis shows the % of total US onshore BOE production that is accounted for by each major US basin. **c.** Histogram of gas production rates comparing the distribution for the sampled non-low production sites with that for the population of non-low production sites in the US. **d.** Comparison of empirical distribution of facility-level production-normalized methane loss rates for the major basins for which measurements are available. We performed non-parametric bootstrap resampling, with replacement, of the data for each basin, repeated  $10^4$  times to generate the likely extent or uncertainties of the distributions conditional on empirical observations. For each basin, we plot the distributions based on the  $10^4$  bootstrap results. Map credit: ESRI, 2023.

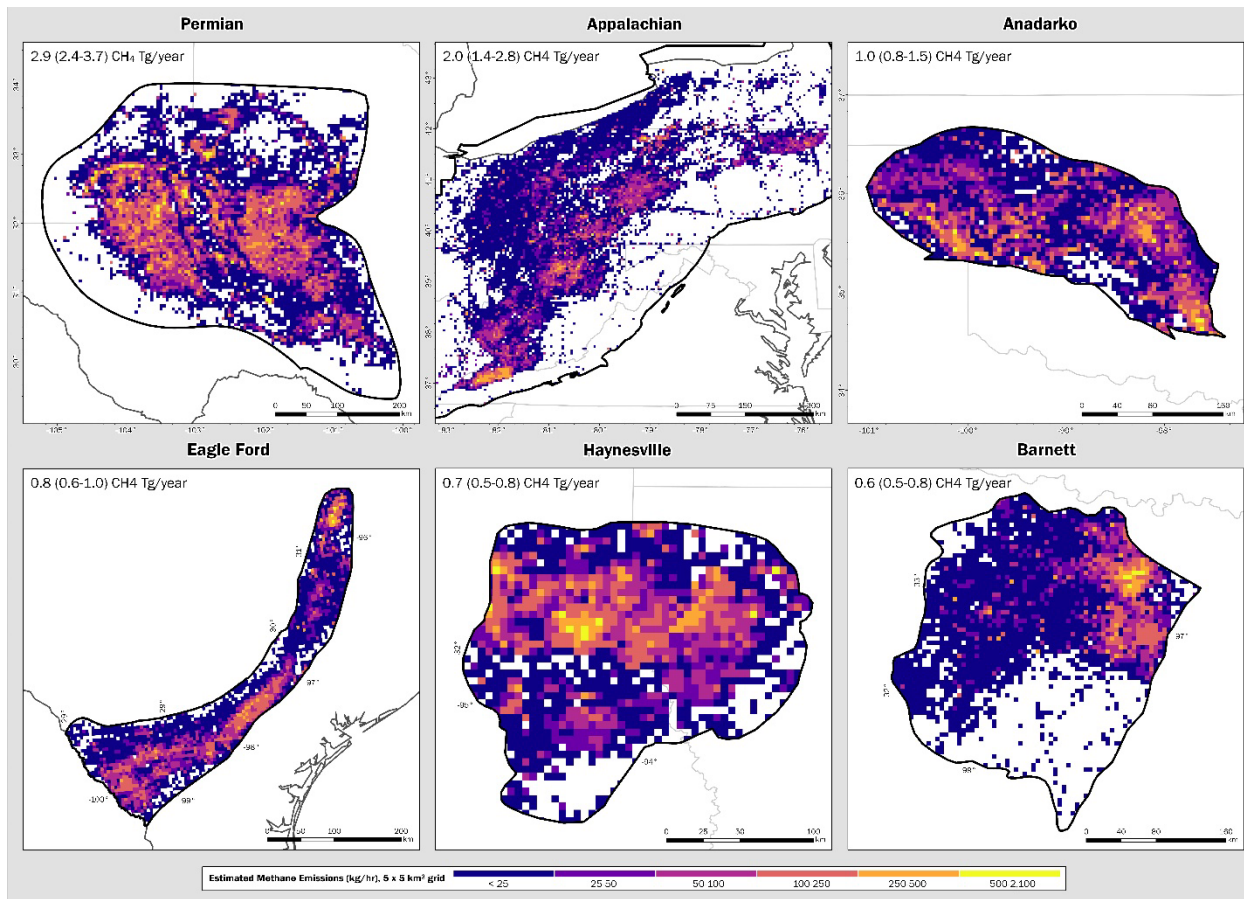

**Figure S4.** Top six methane emitting basins in EI-ME. Map credit: ESRI, 2023.

80

85

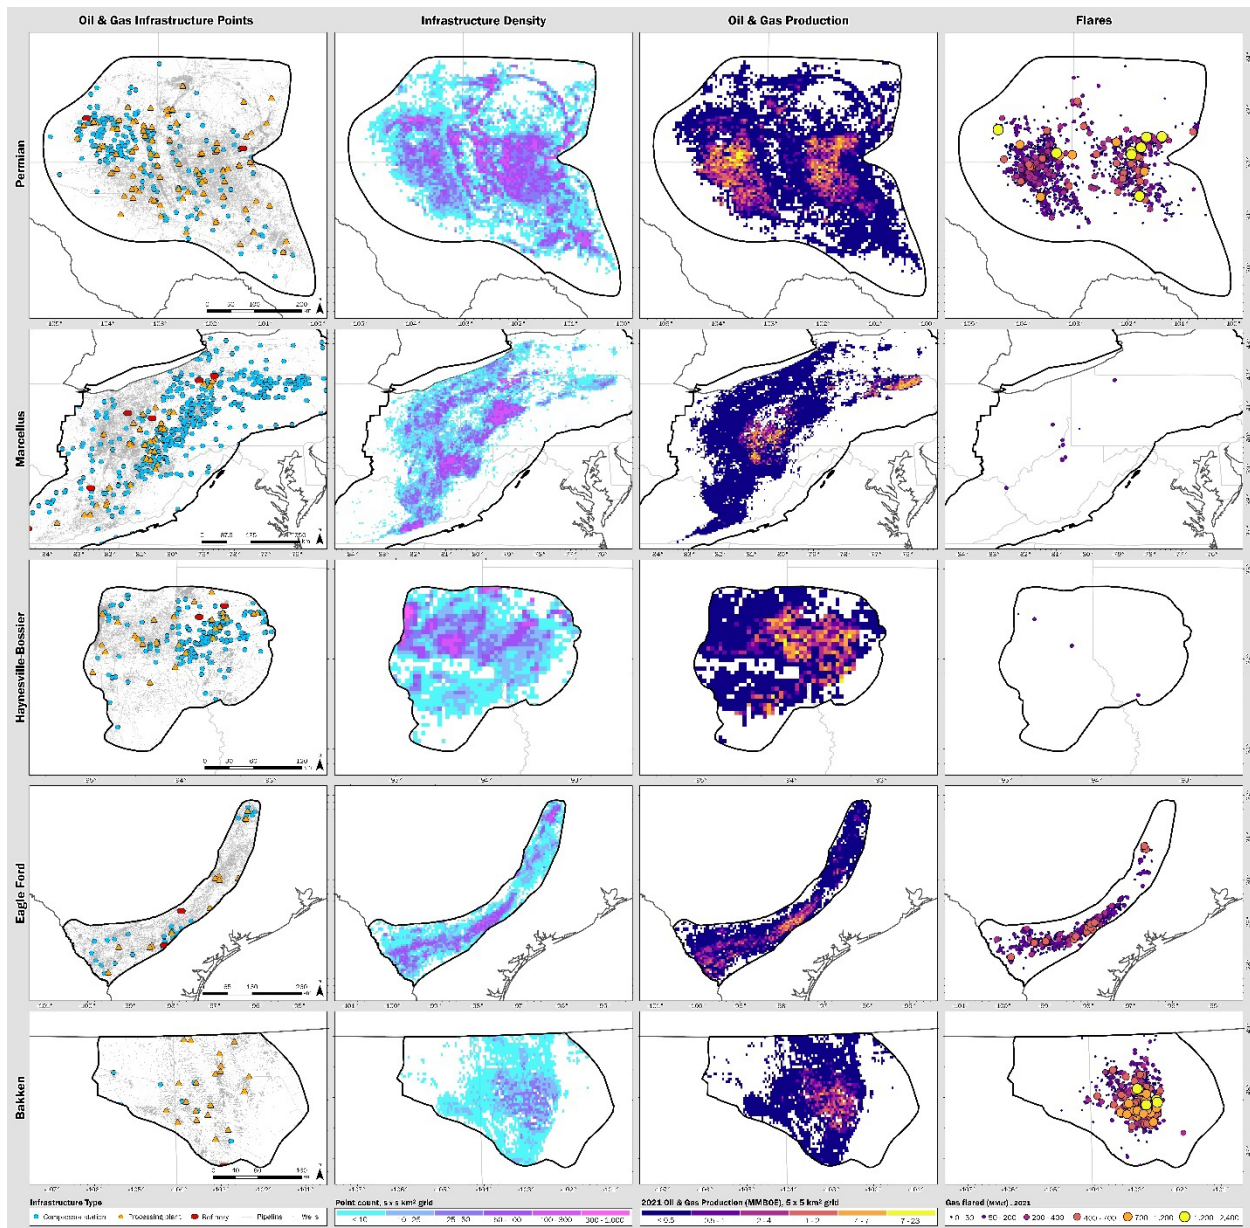

90 **Figure S5.** Comparison of oil and gas activity data for the top five contiguous US oil and gas production basins in 2021. Map credit: ESRI, 2023.

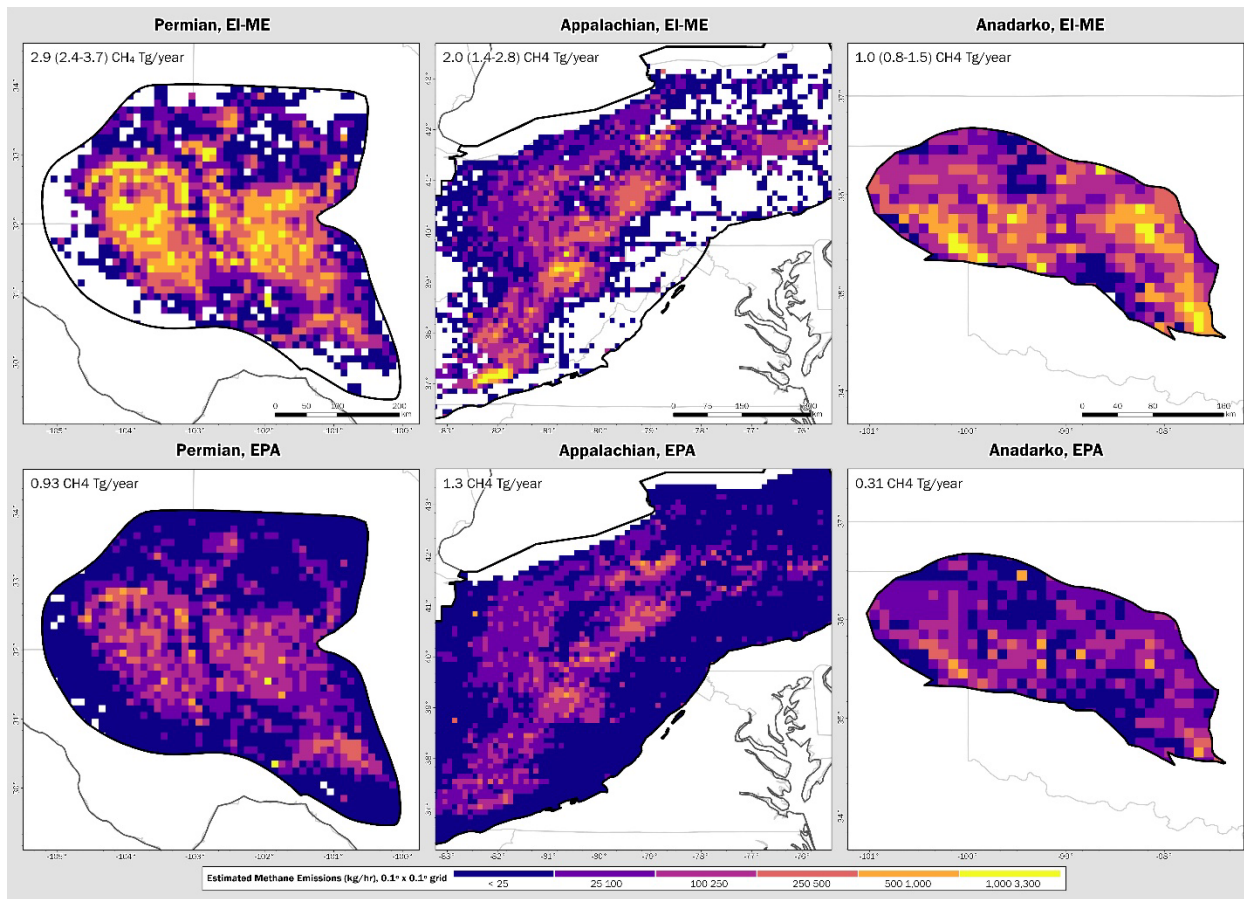

**Figure S6.** Spatial distribution comparison of top 3 emitting basins in EI-ME and EPA GHGI estimates. Map credit: ESRI, 2023.

100

105

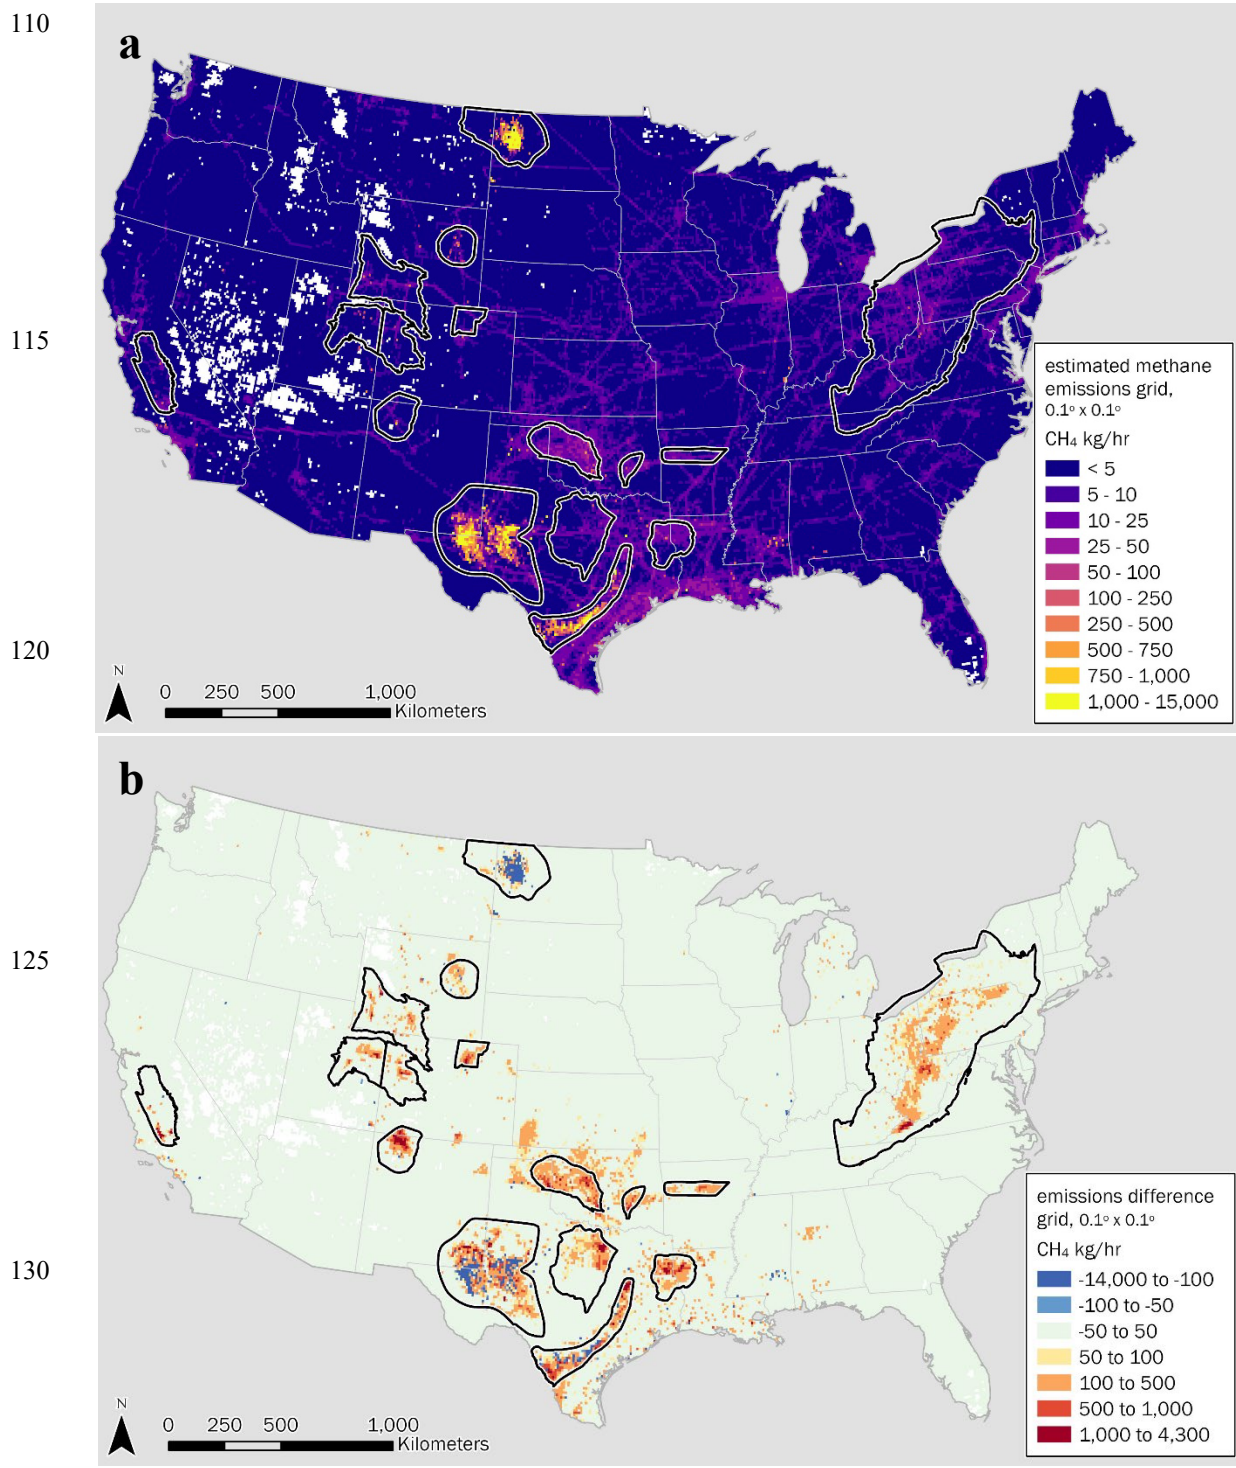

**Figure S7.** Difference in estimated spatial distribution of methane emissions between this study and the EDGAR v8 inventory **a.** Estimated spatial distribution of methane emissions in the EDGAR v8 inventory, showing large methane hotspots in the oil-dominant basins of the Permian, Eagle Ford, and the Bakken. **b.** Difference in spatially explicit methane emissions between this study's measurement-based inventory and the EDGAR v8 inventory, showing large differences in all of the major oil and gas basins. Map credit: ESRI, 2023.



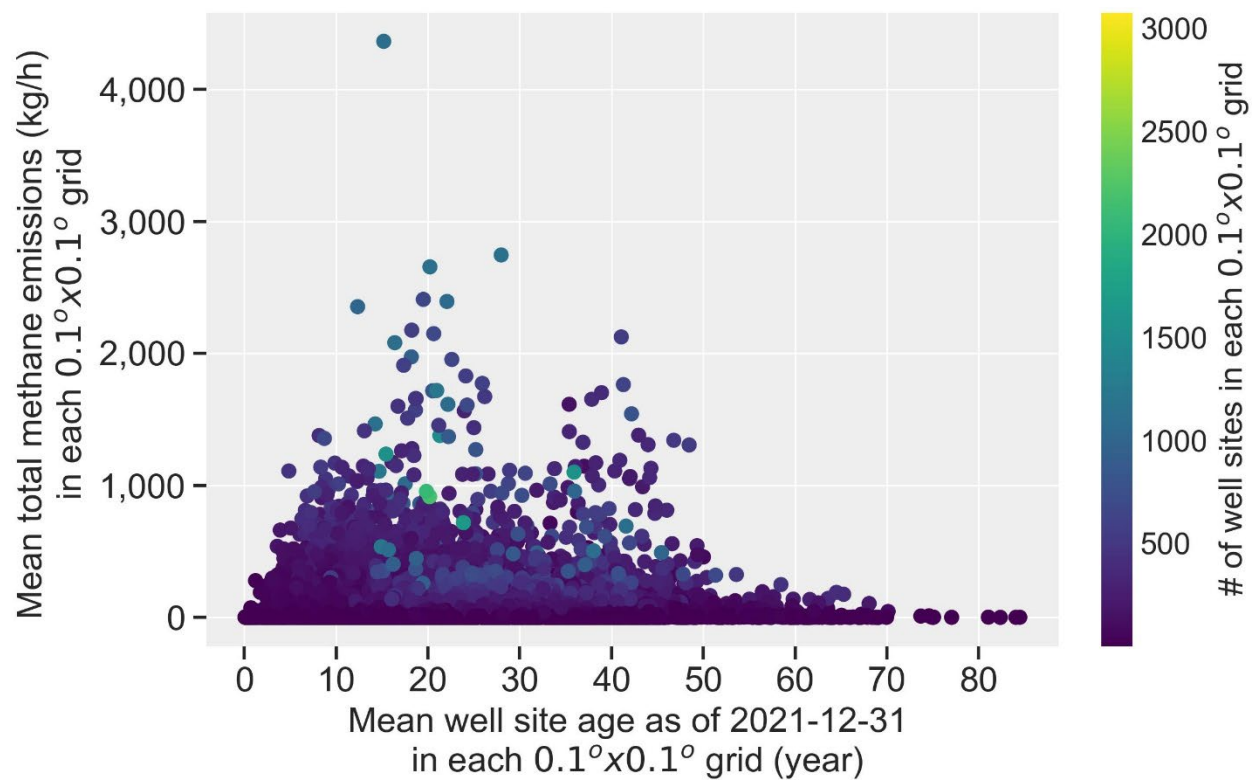

140

**Figure S8.** Assessment of mean total methane emissions within each  $0.1^\circ \times 0.1^\circ$  grid ( $\sim 10 \text{ km} \times 10 \text{ km}$ ) and correlation with mean well site age.

145

150

155

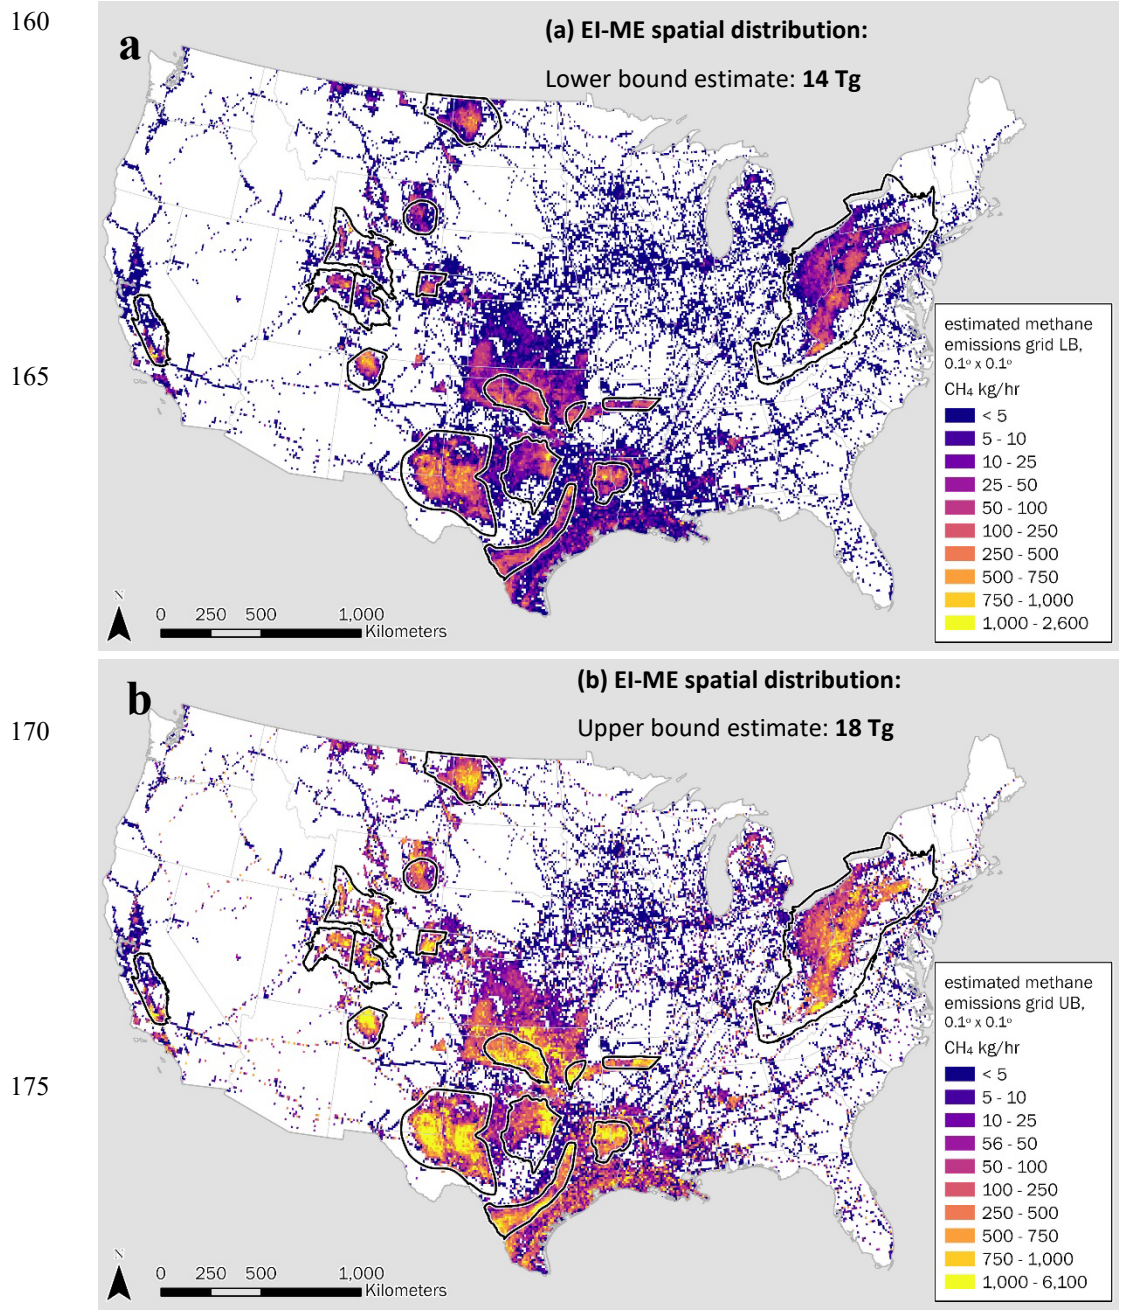

180 **Figure S9.** Estimated spatial distribution of national methane emissions showing the confidence bounds on the mean total methane emissions: **a.** lower bound estimate representing the 2.5th percentile within each  $0.1^\circ \times 0.1^\circ$  grid and **b.** upper bound representing the 97.5th percentile within each  $0.1^\circ \times 0.1^\circ$  grid. The confidence bounds are based on 500 model simulations of each facility's methane emissions as described in the Main Text. Map credit: ESRI, 2023

185

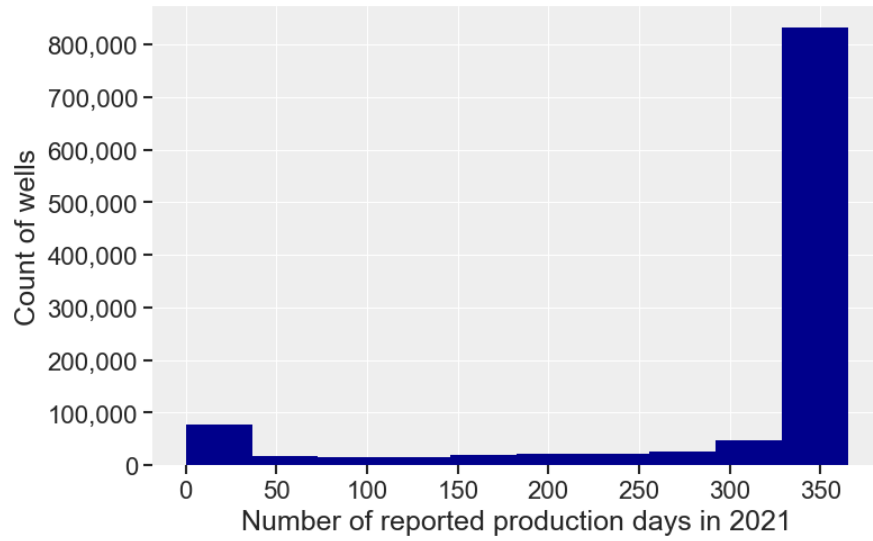

190 **Figure S10.** Reported number of production days per actively producing well in 2021. Onshore US wells only. Analysis based on data from Enverus Prism ([www.enverus.com](http://www.enverus.com)).

195

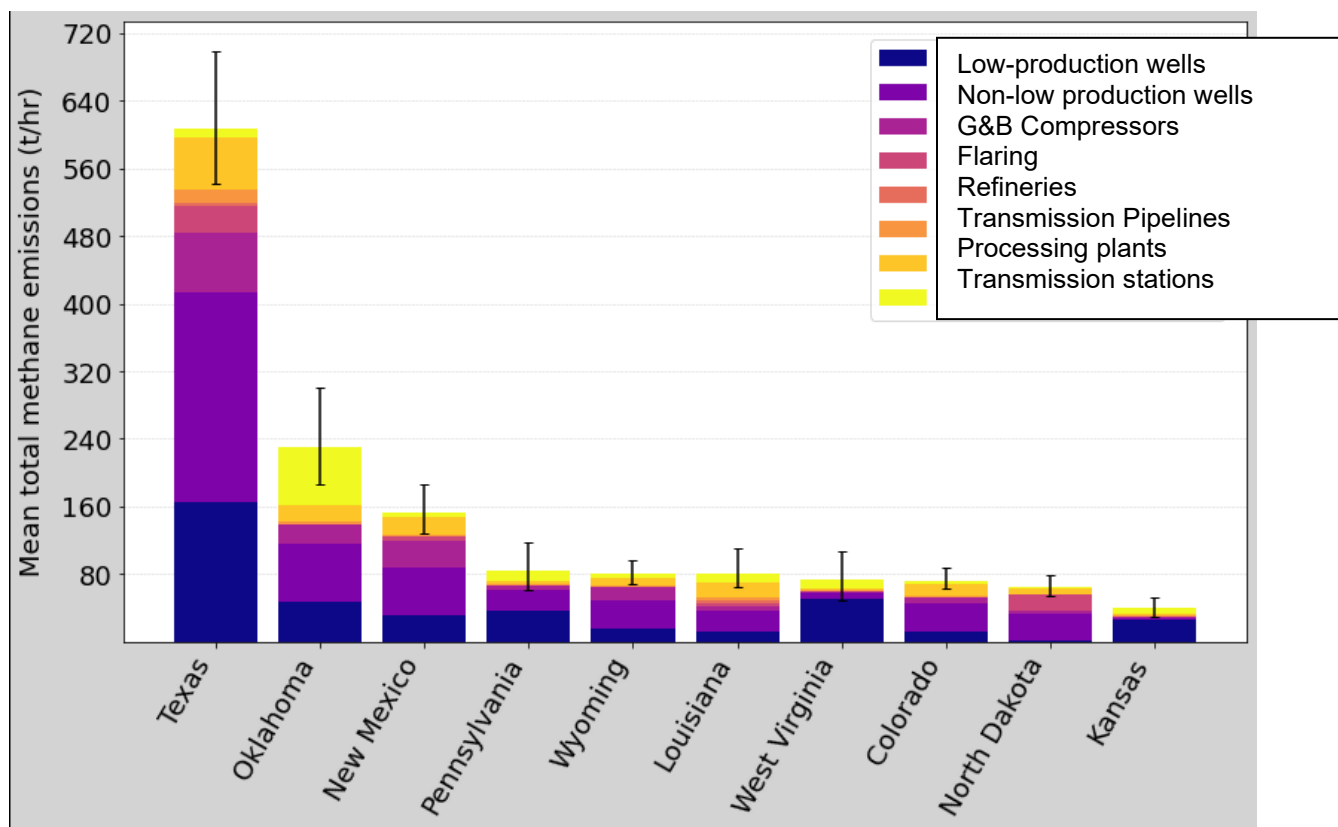

200

**Figure S11.** Estimated total methane emissions at the state level showing the top 10 states based on EI-ME data and analysis. Error bars represent the 95% confidence intervals.
